# Supplementary material
Source: HighWire-hosted journal article supplement (https://erj.ersjournals.com/content/57/2/2004226)
Supplement: inline-supplementary-material-1 [file inline-supplementary-material-1.pdf]

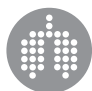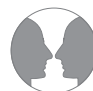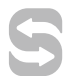

SHAREABLE PDF

# Reply: About the recommendation of the GINA strategy report on asthma step 1

Helen K. Reddel 

**Affiliation:** Global Initiative for Asthma (GINA) Science Committee, and Woolcock Institute of Medical Research, University of Sydney, Sydney, Australia.

**Correspondence:** Helen Reddel, Woolcock Institute of Medical Research, University of Sydney, 431 Glebe Point Road, Glebe NSW 2037, Australia. E-mail: [helen.reddel@sydney.edu.au](mailto:helen.reddel@sydney.edu.au)

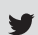

@ERSpublications

**The recommendation by GINA against SABA-only treatment of asthma for adults and adolescents is supported by evidence of harm from even modest SABA over-use, and strong evidence for as-needed ICS-formoterol as a safe and effective way to reduce asthma risk** <https://bit.ly/3oy0tK2>

**Cite this article as:** Reddel HK. Reply: About the recommendation of the GINA strategy report on asthma step 1. *Eur Respir J* 2021; 57: 2004226 [<https://doi.org/10.1183/13993003.04226-2020>].

This single-page version can be shared freely online.

*Reply to S. Ferretti and co-workers:*
